# Supplementary material
Source: HighWire-hosted journal article supplement (https://bmjopen.bmj.com/content/13/3/e067390)
Supplement: inline-supplementary-material-2 [file inline-supplementary-material-2.pdf]

**Supplemental material 2 – Reasons for excluding clinical practice guideline (CPG)**

| Reference of the excluded CPG                                                                                                                                                                                                                                                                                                                                               | Reasons for exclusion           |
|-----------------------------------------------------------------------------------------------------------------------------------------------------------------------------------------------------------------------------------------------------------------------------------------------------------------------------------------------------------------------------|---------------------------------|
| 1. Institute for Clinical Systems Improvement. Adult Depression in Primary Care. Bloomington, MN: ICSI, 2016.                                                                                                                                                                                                                                                               | Duplicate                       |
| 2. Grinspun, D, Bajnok I, Rey M. Delirium, Dementia, and Depression in Older Adults: Assessment and Care. Toronto, Canada: Registered Nurses' Association of Ontario, 2016.                                                                                                                                                                                                 | Duplicate                       |
| 3. Boltz M (Ed.). Evidence-based Geriatric Nursing Protocols for Best Practice. New York, NY: Springer, 2012.                                                                                                                                                                                                                                                               | Duplicate                       |
| 4. MICHIGAN MEDICINE. Ambulatory unipolar depression guideline. [Ann Arbor]: UM; 2021. Available from: <a href="https://michmed-public.policystat.com/policy/8093108/latest/">https://michmed-public.policystat.com/policy/8093108/latest/</a> .                                                                                                                            | Duplicate                       |
| 5. Álvarez Ariza M, Atienza Merino G, Ávila González MJ, <i>et al</i> . GPC sobre el Manejo de la Depresión en el Adulto. Madrid, Spain: Ministerio de Sanidad, Servicios Sociales e Igualdad, 2014.                                                                                                                                                                        | Duplicate                       |
| 6. National Guideline Clearinghouse. Depression (Singapore). Rockville, MD: Agency for Healthcare Research and Quality (AHRQ), 2012. Available from: <a href="https://www.guideline.gov/summaries/summary/39324">https://www.guideline.gov/summaries/summary/39324</a> .                                                                                                    | Duplicate                       |
| 7. Management of Major Depressive Disorder Working Group. VA/DoD clinical practice guideline for the management of major depressive disorder. 3rd ed. Washington, DC: US Department of Veterans Affairs, US Department of Defense, 2016.                                                                                                                                    | Duplicate                       |
| 8. Austin M-P, Hight N, The Expert Working Group. Mental Health Care in the Perinatal Period: Australian Clinical Practice Guideline. Melbourne, Australia: Centre of Perinatal Excellence, 2017.                                                                                                                                                                           | Focused on specific populations |
| 9. McDermott B, Baigent M, Chanen A, <i>et al</i> . Clinical Practice Guidelines: Depression in Adolescents and Young Adults. Melbourne, Australia: Agency for Healthcare Research and Quality, 2010.                                                                                                                                                                       | Focused on specific populations |
| 10. Michigan Quality Improvement Consortium Guideline. Primary Care Diagnosis and Management of Adults with Depression. Detroit, MI: MQIC; 2018. Available from: <a href="http://mqic.org/guidelines.htm">http://mqic.org/guidelines.htm</a> .                                                                                                                              | Duplicate                       |
| 11. National Institute for Health and Clinical Excellence. Depression in Children and Young People: Identification and Management in Primary, Community and Secondary Care. Leicester, UK: British Psychological Society, 2005.                                                                                                                                             | Focused on specific populations |
| 12. Connolly KR, Thase ME. If at first you don't succeed: a review of the evidence for antidepressant augmentation, combination and switching strategies. <i>Drugs</i> 2011, 71(1):43-64. DOI:10.2165/11587620-000000000-00000.                                                                                                                                             | Duplicate                       |
| 13. Kennedy SH, Lam RW, McIntyre RS, <i>et al</i> . Canadian network for mood and anxiety treatments (CANMAT), 2016, clinical CPGs for the management of adults with major depressive disorder: section 3: pharmacological treatments. <i>Can J Psychiatry</i> . 2016, 61(9)540-560. DOI: <a href="https://doi.org/10.1177/0706743716659417">10.1177/0706743716659417</a> . | Duplicate                       |

| Reference of the excluded CPG                                                                                                                                                                                                                                                                                                                                                                                                                                           | Reasons for exclusion |
|-------------------------------------------------------------------------------------------------------------------------------------------------------------------------------------------------------------------------------------------------------------------------------------------------------------------------------------------------------------------------------------------------------------------------------------------------------------------------|-----------------------|
| 14. Taylor RW, Marwood L, Oprea E, <i>et al.</i> Pharmacological Augmentation in Unipolar Depression: A Guide to the Guidelines. <i>Int J Neuropsychopharmacol.</i> 2020, 23(9):587-625. DOI:10.1093/ijnp/pyaa033.                                                                                                                                                                                                                                                      | Duplicate             |
| 15. Voineskos D, Daskalakis ZJ, Blumberger DM. Management of Treatment-Resistant Depression: Challenges and Strategies. <i>Journal of Clinical Psychopharmacology and Therapeutics</i> . 2020,16:221-234. Published 2020 Jan 21. DOI: 10.2147/NDT.S198774.                                                                                                                                                                                                              | Duplicate             |
| 16. Samochowiec J, Dudek D, Kucharska Mazur J, Murawiec S, Rymaszewska J, Cubała WJ, Heitzman J, Szulc A, Bała M, Gątecki P. Pharmacological treatment of a depressive episode and recurrent depressive disorder - guidelines of the Polish Psychiatric Association and the National Consultant for Adult Psychiatry. <i>Psychiatr Pol.</i> 2021 Mar 12;55(2):235-259. English, Polish. DOI: 10.12740/PP/ OnlineFirst/132496. Epub 2021 Mar 12. PMID: 34365477.         | Duplicate             |
| 17. MICHIGAN MEDICINE. Ambulatory unipolar depression guideline. [Ann Arbor]: UM; 2021. Available from: <a href="https://michmed-public.policystat.com/policy/8093108/latest/">https://michmed-public.policystat.com/policy/8093108/latest/..</a>                                                                                                                                                                                                                       | Duplicate             |
| 18. MALAYSIAN HEALTH TECHNOLOGY ASSESSMENT SECTION. Management of major depressive disorder. 2nd ed. Putrajaya: MaHTAS, 2019. Available from: <a href="http://www.psychiatry-malaysia.org/">http://www.psychiatry-malaysia.org/...</a>                                                                                                                                                                                                                                  | Duplicate             |
| 19. Malhi GS, Bell E, Boyce P, Bassett D, Berk M, Bryant R, Gitlin M, Hamilton A, Hazell P, Hopwood M, Lyndon B, McIntyre RS, Morris G, Mulder R, Porter R, Singh AB, Yatham LN, Young A, Murray G. The 2020 Royal Australian and New Zealand College of psychiatrists clinical practice guidelines for mood disorders: Bipolar disorder summary. <i>Bipolar Disord.</i> 2020 Dec, 22(8):805-821. DOI: 10.1111/bdi.13036. PMID: 33296123.                               | Subject matter        |
| 20. Moeller SB, Gbyl K, Hjorthøj C, Andreasen M, Austin SF, Buchholtz PE, Fønss L, Hjerrild S, Hogervorst L, Jørgensen MB, Ladegaard N, Martiny K, Meile J, Packness A, Sigaard KR, Straarup K, Straszek SPV, Soerensen CH, Welcher B, Videbech P. Treatment of difficult-to-treat depression - clinical guideline for selected interventions. <i>Nord J Psychiatry.</i> 2022 Apr, 76(3):177-188. DOI: 10.1080/08039488.2021.1952303. Epub 2021 Aug 28. PMID: 34455900. | Duplicate             |
| 21. Kennedy SH, Lam RW, McIntyre RS, <i>et al.</i> Canadian network for mood and anxiety treatments (CANMAT) 2016 clinical guidelines for the management of adults with major depressive disorder: section 3. pharmacological treatments. <i>Can J Psychiatry</i> 2016, 61:540-60.                                                                                                                                                                                      | Duplicate             |
| 22. National Institute for Health and Care Excellence. Depression in Adults: Recognition and Management. 2009. Available from: <a href="https://www.nice.org.uk/guidance/cg90/evidence">https://www.nice.org.uk/guidance/cg90/evidence</a> .                                                                                                                                                                                                                            | Duplicate             |

|                                                                                                                                                                                                                                                                                                                                                                                                                                                                                                                                                                                                                                                                                                                         | <b>Reasons for exclusion</b> |
|-------------------------------------------------------------------------------------------------------------------------------------------------------------------------------------------------------------------------------------------------------------------------------------------------------------------------------------------------------------------------------------------------------------------------------------------------------------------------------------------------------------------------------------------------------------------------------------------------------------------------------------------------------------------------------------------------------------------------|------------------------------|
| 23. Ministerio de Salud (CL). Depresión em personas de 15 años y más. Santiago: Minsal, 2013.                                                                                                                                                                                                                                                                                                                                                                                                                                                                                                                                                                                                                           | Duplicate                    |
| 24. Ministerio de Salud (COL). Detección temprana y diagnóstico del episodio depresivo y trastorno depresivo recurrente en adultos: atención integral de los adultos con diagnóstico de episodio depresivo o trastorno depresivo recurrente: Guía de práctica clínica. Bogotá: Minsalud; 2013 [cited 2017 Jun 30]. Available from: <a href="http://www.iets.org.co/reportes-iets/Documentacin%20Reportes/Gu%C3%ADa.Completa.Depresion,2013.pdf">http://www.iets.org.co/reportes-iets/Documentacin%20Reportes/Gu%C3%ADa.Completa.Depresion,2013.pdf</a>                                                                                                                                                                  | Duplicate                    |
| 25. Álvarez Ariza M, Atienza Merino G, Ávila González MJ, <i>et al.</i> GPC sobre el Manejo de la Depresión en el Adulto. Madrid, Spain: Ministerio de Sanidad, Servicios Sociales e Igualdad, 2014.                                                                                                                                                                                                                                                                                                                                                                                                                                                                                                                    | Duplicate                    |
| 26. National Guideline Clearinghouse. Depression (Singapore). Rockville, MD: Agency for Healthcare Research and Quality (AHRQ); 2012. Available from: <a href="https://www.guideline.gov/summaries/summary/39324..">https://www.guideline.gov/summaries/summary/39324..</a>                                                                                                                                                                                                                                                                                                                                                                                                                                             | Duplicate                    |
| 27. American Psychological Association. (2019). Clinical practice guideline for the treatment of depression across three age cohorts. Retrieved from <a href="https://www.apa.org/depression-guideline">https://www.apa.org/depression-guideline</a> .                                                                                                                                                                                                                                                                                                                                                                                                                                                                  | Duplicate                    |
| 28. Bennabi D, Charpeaud T, Yroni A, Genty JB, Destouches S, Lancrenon S, Alaïli N, Bellivier F, Bougerol T, Camus V, Dorey JM, Doumy O, Haesebaert F, Holtzmann J, Lançon C, Lefebvre M, Moliere F, Nieto I, Rabu C, Richieri R, Schmitt L, Stephan F, Vaiva G, Walter M, Leboyer M, El-Hage W, Llorca PM, Courtet P, Aouizerate B, Haffen E. Clinical guidelines for the management of treatment-resistant depression: French recommendations from experts, the French Association for Biological Psychiatry and Neuropsychopharmacology and the foundation FondaMental. <i>BMC Psychiatry</i> . 2019 Aug 28, 19(1):262. DOI: 10.1186/s12888-019-2237-x. PMID: 31455302, PMCID: PMC6712810.                           | Duplicate                    |
| 29. Bennabi D, Yroni A, Charpeaud T, Genty JB, Destouches S, Lancrenon S, Allaili N, Bellivier F, Bougerol T, Camus V, Doumy O, Dorey JM, Haesebaert F, Holtzmann J, Lançon C, Lefebvre M, Moliere F, Nieto I, Rabu C, Richieri R, Schmitt L, Stephan F, Vaiva G, Walter M, Leboyer M, El-Hage W, Aouizerate B, Haffen E, Llorca PM, Courtet P. Clinical guidelines for the management of depression with specific comorbid psychiatric conditions French recommendations from experts (the French Association for Biological Psychiatry and Neuropsychopharmacology and the foundation FondaMental). <i>BMC Psychiatry</i> . 2019 Jan 30, 19(1):50. DOI: 10.1186/s12888-019-2025-7. PMID: 30700272, PMCID: PMC6354367. | Duplicate                    |
| 30. Malhi, G. S. <i>et al.</i> Royal Australian and New Zealand College of Psychiatrists clinical practice guidelines for mood disorders: major depression summary. <i>Medical Journal of Australia</i> , Sydney, v. 208, n. 5, 2018. DOI <a href="http://doi.org/10.5694/mja17.00659">http://doi.org/10.5694/mja17.00659</a> . Available from: <a href="https://www.mja.com.au/journal/2018/208/4/royal-australian-and-new-zealand-college-psychiatrists-clinical-practice">https://www.mja.com.au/journal/2018/208/4/royal-australian-and-new-zealand-college-psychiatrists-clinical-practice</a> .                                                                                                                   | Duplicate                    |

| Reference of the excluded CPG                                                                                                                                                                                                                                                                                                                                                                                                                                                 | Reasons for exclusion                     |
|-------------------------------------------------------------------------------------------------------------------------------------------------------------------------------------------------------------------------------------------------------------------------------------------------------------------------------------------------------------------------------------------------------------------------------------------------------------------------------|-------------------------------------------|
| 31. Nonpharmacologic Versus Pharmacologic Treatment of Adult Patients With Major Depressive Disorder: A Clinical Practice Guideline From the American College of Physicians, 2016. <a href="https://www.acpjournals.org/doi/10.7326/M15-2570">https://www.acpjournals.org/doi/10.7326/M15-2570</a> .                                                                                                                                                                          | Duplicate                                 |
| 32. Evidence-based guidelines for treating depressive disorders with antidepressants: A revision of the 2008 British Association for Psycho. Available from: <a href="https://www.bap.org.uk/pdfs/BAP_Guidelines-Antidepressants.pdf">https://www.bap.org.uk/pdfs/BAP_Guidelines-Antidepressants.pdf</a> . pharmacologyguidelines. Journal of Psychopharmacology, 2015, v. 29(5) 459-525 DOI: 10.1177/0269881115581093 <a href="http://jop.sagepub.com">jop.sagepub.com</a> . | Duplicate                                 |
| 33. National Institute for Health and Care Excellence. Common Mental Health Disorders. Identification and Pathways to Care. London, UK: NICE, 2011.                                                                                                                                                                                                                                                                                                                           | Did not include pharmacological treatment |
| 34. Patten SB. Updated CANMAT guidelines for treatment of major depressive disorder. Can J Psychiatry 2016, 61(9):504-5. DOI:10.1177/0706743716660034.                                                                                                                                                                                                                                                                                                                        | Did not include pharmacological treatment |
| 35. Rush AJ, Aaronson ST, Demyttenaere K. Difficult-to-treat depression: a clinical and research roadmap for when remission is elusive. Aust N Z J Psychiatry 2019, 53(2):109-18. DOI:10.1177/0004867418808585.                                                                                                                                                                                                                                                               | Did not include pharmacological treatment |
| 36. Repetitive transcranial magnetic stimulation for depression NICE, 2015. Available from: <a href="https://www.nice.org.uk/guidance/ipg542/resources/repetitive-transcranial-magnetic-stimulation-for-depression-pdf-1899871923433669">https://www.nice.org.uk/guidance/ipg542/resources/repetitive-transcranial-magnetic-stimulation-for-depression-pdf-1899871923433669</a> .                                                                                             | Did not include pharmacological treatment |
| 37. Bennabi D, Haffen E. Transcranial Direct Current Stimulation (tDC): A Promising Treatment for Major Depressive Disorder? Brain Sci. 2018, 8(5):81. Published 2018 May 6. DOI:10.3390/brainsci8050081.                                                                                                                                                                                                                                                                     | Did not include pharmacological treatment |
| 38. Thompson W, Adcock L. Intensive Day Treatment Programs for Mental Health Treatment: A Review of Clinical Effectiveness, Cost-Effectiveness, and Guidelines [Internet]. Ottawa (ON): Canadian Agency for Drugs and Technologies in Health, 2017 Sep 15. Available from: <a href="https://www.ncbi.nlm.nih.gov/books/NBK513364/">https://www.ncbi.nlm.nih.gov/books/NBK513364/</a> .                                                                                        | Did not include pharmacological treatment |
| 39. Ho C, Adcock L. Short-Term Psychodynamic Psychotherapy for the Treatment of Mental Illness: A Review of Clinical Effectiveness and Guidelines [Internet]. Ottawa (ON): Canadian Agency for Drugs and Technologies in Health, 2017 Oct 12. PMID: 30234931.                                                                                                                                                                                                                 | Did not include pharmacological treatment |
| 40. Palylyk-Colwell E, Argáez C. Telehealth for the Assessment and Treatment of Depression, Post-Traumatic Stress Disorder, and Anxiety: Clinical Evidence [Internet]. Ottawa (ON): Canadian Agency for Drugs and Technologies in Health, 2018 Apr 10. Disponible en: <a href="https://www.ncbi.nlm.nih.gov/books/NBK532701/">https://www.ncbi.nlm.nih.gov/books/NBK532701/</a> .                                                                                             | Did not include pharmacological treatment |
| 41. Pohar R, Farrah K. Repetitive Transcranial Magnetic Stimulation for Patients with Depression: A Review of Clinical Effectiveness, Cost-Effectiveness and Guidelines – An Update [Internet]. Ottawa (ON): Canadian Agency for Drugs and Technologies in Health, 2019 Jun 28. PMID: 31433608.                                                                                                                                                                               | Did not include pharmacological treatment |

| Reference of the excluded CPG                                                                                                                                                                                                                                                                                                                                                                                                                                                          | Reasons for exclusion                     |
|----------------------------------------------------------------------------------------------------------------------------------------------------------------------------------------------------------------------------------------------------------------------------------------------------------------------------------------------------------------------------------------------------------------------------------------------------------------------------------------|-------------------------------------------|
| 42. Ho C, Severn M. e-Therapy Interventions for the Treatments of Patients with Depression: A Review of Clinical Effectiveness [Internet]. Ottawa (ON): Canadian Agency for Drugs and Technologies in Health, 2018 May 16. Available from: <a href="https://www.ncbi.nlm.nih.gov/books/NBK532214/">https://www.ncbi.nlm.nih.gov/books/NBK532214/</a> .                                                                                                                                 | Did not include pharmacological treatment |
| 43. CANADIAN AGENCY FOR DRUGS AND TECHNOLOGIES IN HEALTH. Internet-delivered cognitive behavioural therapy for major depressive disorder and anxiety disorders. [Ottawa, ON]: CADTH, 2019. Available from: <a href="https://www.cadth.ca/brief-internet-delivered-cognitive-behavioural-therapy-major-depressive-disorder-and-anxiety">https://www.cadth.ca/brief-internet-delivered-cognitive-behavioural-therapy-major-depressive-disorder-and-anxiety</a> .                         | Did not include pharmacological treatment |
| 44. Frye MA. Clinical practice: bipolar disorder--a focus on depression. N Engl J Med 2011, 364(1):51-9.                                                                                                                                                                                                                                                                                                                                                                               | Subject matter                            |
| 45. Andersen BL, DeRubeis RJ, Berman BS, <i>et al</i> . Screening, assessment, and care of anxiety and depressive symptoms in adults with cancer: an American Society of Clinical Oncology guideline adaptation. J Clin Oncol 2014, 32(15):1605-19. DOI:10.1200/JCO.2013.52.4611.                                                                                                                                                                                                      | Focused on specific populations           |
| 46. American Medical Directors Association. Guideline Summary: Depression in the Long Term Care Setting. Columbia, MD: AMDA; 2011.                                                                                                                                                                                                                                                                                                                                                     | Subject matter                            |
| 47. Li M, Kennedy EB, Byrne N, <i>et al</i> . The management of depression in patients with cancer: a clinical practice guide. J OncolPract 2016, 12(8):747-56. DOI:10.1200/JOP.2016.011072.                                                                                                                                                                                                                                                                                           | Subject matter                            |
| 48. Ostacher MJ, Tandon R, Suppes T. Florida best practice psychotherapeutic medication guidelines for adults with bipolar disorder: a novel, practical, patient-centered guide for clinicians. J Clin Psychiatry 2016, 77(7):920-6. DOI:10.4088/JCP.15cs.09841. Available from: <a href="http://www.embase.com/search/results?subaction=viewrecord&amp;from=export&amp;id=L611538719">http://www.embase.com/search/results?subaction=viewrecord&amp;from=export&amp;id=L611538719</a> | Subject matter                            |
| 49. Pfennig A, Bschor T, Falkai P, <i>et al</i> . The diagnosis and treatment of bipolar disorder: recommendations from the current S3 guideline. Dtsch Arztebl Int 110(6):92-100. DOI:10.3238/arztebl.2013.0092. 2013.                                                                                                                                                                                                                                                                | Subject matter                            |
| 50. Rosenblat JD, McIntyre RS. Treatment recommendations for DSM-5-defined mixed features. CNS Spectr 2017, 22(2):147- 54. DOI:10.1017/S1092852916000432.                                                                                                                                                                                                                                                                                                                              | Subject matter                            |
| 51. HEALTHCARE IMPROVEMENT SCOTTLAD. Scottish palliative care guidelines: depression. Edinburgh: NHSScotland, 2019. Available from: <a href="https://www.palliativecareguidelines.scot.nhs.uk/guidelines/symptom-control/Depression.aspx">https://www.palliativecareguidelines.scot.nhs.uk/guidelines/symptom-control/Depression.aspx</a> .                                                                                                                                            | Subject matter                            |
| 52. Assessment and Interventions for Perinatal Depression. Available from: <a href="https://rnao.ca/sites/rnao-ca/files/bpg/Perinatal_Depression_FINAL_web_0.pdf">https://rnao.ca/sites/rnao-ca/files/bpg/Perinatal_Depression_FINAL_web_0.pdf</a> Registered Nurses' Association of Ontario. Assessment and Interventions for Perinatal Depression <sup>ion</sup> . 2nd ed. Toronto (ON): Registered Nurses' Association of Ontario, 2018.                                            | Focused on specific populations           |

| Reference of the excluded CPG                                                                                                                                                                                                                                                                                                                                                                                                                                                                                      | Reasons for exclusion                     |
|--------------------------------------------------------------------------------------------------------------------------------------------------------------------------------------------------------------------------------------------------------------------------------------------------------------------------------------------------------------------------------------------------------------------------------------------------------------------------------------------------------------------|-------------------------------------------|
| 53. Carneiro LF, Mota MP, Schuch F, Deslandes A, Vasconcelos-Raposo J. Portuguese and Brazilian guidelines for the treatment of depression: exercise as medicine. <i>Braz J Psychiatry</i> . 2017 Aug 30, 40(2):210-211. DOI: 10.1590/1516-4446-2017-2272. PMID: 28876380; PMCID: PMC6900767.                                                                                                                                                                                                                      | Did not include pharmacological treatment |
| 54. JOBST, A. European Psychiatric Association Guidance on psychotherapy in chronic depression across Europe. <i>European Psychiatry</i> , v. 33, n. 2016, p. 18-36. DOI <a href="http://doi.org/10.1016/j.eurpsy.2015.12.003">http://doi.org/10.1016/j.eurpsy.2015.12.003</a> . Available from: <a href="http://www.europsy.net/app/uploads/2016/05/Psychotherapy-in-chronic-depression-across-Europe.pdf">http://www.europsy.net/app/uploads/2016/05/Psychotherapy-in-chronic-depression-across-Europe.pdf</a> . | Did not include pharmacological treatment |
| 55. FSRH CEU Statement: Response to published study: Association of Hormonal Contraception with Depression (October 2016) <a href="file:///C:/Users/Usuario/Downloads/association-of-hc-with-depression%20(1).pdf">file:///C:/Users/Usuario/Downloads/association-of-hc-with-depression%20(1).pdf</a> .                                                                                                                                                                                                            | Was not a CPG                             |
| 56. Practice Guidelines for the Prevention, Detection, and Management of Respiratory Depression Associated with Neuraxial Opioid Administration: An Updated Report by the American Society of Anesthesiologists Task Force on Neuraxial Opioids and the American Society of Regional Anesthesia and Pain Medicine*. <i>Anesthesiology</i> 2016, 124:535–552 DOI: <a href="https://doi.org/10.1097/ALN.0000000000000975">https://doi.org/10.1097/ALN.0000000000000975</a> .                                         | Subject matter                            |
| 57. Manipulating the sleep-wake cycle and circadian rhythms to improve clinical management of major depression DOI:10.1186/1741-7015-11-79. <i>BMC Medicine</i> 2013, 11:79.                                                                                                                                                                                                                                                                                                                                       | Subject matter                            |
| 58. NATIONAL INSTITUTE FOR HEALTH AND CARE EXCELLENCE. Space from depression for treating adults with depression. [London]: NICE, 2020. Available from: <a href="https://www.nice.org.uk/advice/mib215/resources/space-from-depression-for-treating-adults-with-depression-pdf-2285965453227973">https://www.nice.org.uk/advice/mib215/resources/space-from-depression-for-treating-adults-with-depression-pdf-2285965453227973</a> .                                                                              | Subject matter                            |
| 59. Goracci A, Forgione RN, De Giorgi R, Coluccia A, Cuomo S, Fagiolini A. Practical guidance for prescribing trazodone extended-release in major depression. <i>Expert Opin Pharmacother</i> . 2016, 17(3):433-41. DOI:                                                                                                                                                                                                                                                                                           | Specific drugs                            |
| 60. Kandasamy S, Campbell K. Psychotherapy and Pharmacotherapy for Major Depressive Disorder and Generalized Anxiety Disorder: A Rapid Qualitative Review [Internet]. Ottawa (ON): Canadian Agency for Drugs and Technologies in Health, 2019 Jun 4. PMID: 33074608.                                                                                                                                                                                                                                               | Was not a CPG                             |
| 61. Antidepressants in Elderly Patients with Major and Minor Depression: A Review of Clinical Effectiveness and Guidelines [Internet]. Ottawa (ON): Canadian Agency for Drugs and Technologies in Health, 2015 Aug 17. Available from: <a href="https://www.ncbi.nlm.nih.gov/books/NBK315889/">https://www.ncbi.nlm.nih.gov/books/NBK315889/</a> .                                                                                                                                                                 | Was not a CPG                             |

| Reference of the excluded CPG                                                                                                                                                                                                                                                                                                                                                                                                                                                                                                                                                                                                                                                                                     | Reasons for exclusion           |
|-------------------------------------------------------------------------------------------------------------------------------------------------------------------------------------------------------------------------------------------------------------------------------------------------------------------------------------------------------------------------------------------------------------------------------------------------------------------------------------------------------------------------------------------------------------------------------------------------------------------------------------------------------------------------------------------------------------------|---------------------------------|
| 62. WELLS, C., CAMPBELL, K. Antidepressants for adults with depression using opioid medications: clinical effectiveness and guidelines. Ottawa, ON: CADTH, 2018 Feb. (CADTH rapid response report: summary of abstracts).                                                                                                                                                                                                                                                                                                                                                                                                                                                                                         | Was not a CPG                   |
| 63. Kim J, Mierzwinski-Urban M. Ketamine for Treatment-Resistant Depression or Post-Traumatic Stress Disorder in Various Settings: A Review of Clinical Effectiveness, Safety, and Guidelines [Internet]. Ottawa (ON): Canadian Agency for Drugs and Technologies in Health, 2017 Mar 1. PMID: 29533569.                                                                                                                                                                                                                                                                                                                                                                                                          | Focused on specific populations |
| 64. TADROUS, M., LÉSÉLEUC, L. Drugs for major depressive disorder. Ottawa, ON: CADTH, 2020 Feb. (CADTH technology review: focused critical appraisal; n. 24). Available from: <a href="https://www.cadth.ca/major-depressive-disorder-focused-critical-appraisal-network-meta-analysis">https://www.cadth.ca/major-depressive-disorder-focused-critical-appraisal-network-meta-analysis</a> .                                                                                                                                                                                                                                                                                                                     | Was not a CPG                   |
| 65. Diagnosing, Screening, and Monitoring Depression in the Elderly: A Review of Guidelines [Internet]. Ottawa (ON): Canadian Agency for Drugs and Technologies in Health, 2015 Sep 8. PMID: 26468558.                                                                                                                                                                                                                                                                                                                                                                                                                                                                                                            | Was not a CPG                   |
| 66. E-NOTAS. Modelos e intervenciones de colaboración entre atención primaria y salud mental en la atención a los pacientes diagnosticados de depresión: resultados de una meta-revisión. [Oviedo]: 2014. Available from: <a href="https://enotas.astursalud.es/-/modelos-e-intervenciones-de-colaboraci%C3%B3n-entre-atenci%C3%B3n-primaria-y-salud-mental-en-la-atenci%C3%B3n-a-los-pacientes-diagnosticados-de-depresi%C3%B3n-resultados-de-una-meta-revisi%C3%B3n-">https://enotas.astursalud.es/-/modelos-e-intervenciones-de-colaboraci%C3%B3n-entre-atenci%C3%B3n-primaria-y-salud-mental-en-la-atenci%C3%B3n-a-los-pacientes-diagnosticados-de-depresi%C3%B3n-resultados-de-una-meta-revisi%C3%B3n-</a> . | Was not a CPG                   |
| 67. MacDonald E, Horton J. Bupropion for Major Depressive Disorder or Persistent Depressive Disorder (Dysthymia) [Internet]. Ottawa (ON): Canadian Agency for Drugs and Technologies in Health; 2021 Apr. Available from: <a href="https://www.ncbi.nlm.nih.gov/books/NBK571946/">https://www.ncbi.nlm.nih.gov/books/NBK571946/</a> .                                                                                                                                                                                                                                                                                                                                                                             | Was not a CPG                   |
| 68. Poitras V, Visintini S. Desvenlafaxine versus Venlafaxine for the Treatment of Adult Patients with Major Depressive Disorder: A Review of the Comparative Clinical and Cost-Effectiveness [Internet]. Ottawa (ON): Canadian Agency for Drugs and Technologies in Health, 2017 Oct 25. PMID: 29889482.                                                                                                                                                                                                                                                                                                                                                                                                         | Was not a CPG                   |
| 69. YATHAM, L. Cognitive heterogeneity in bd: validity, trajectories and biological mechanisms symposium [Symposium Abstracts; SY1]. Bipolar Disorders, Copenhagen v. 23, n. S1, p. 15-47. DOI <a href="https://doi.org/10.1111/bdi.13086">https://doi.org/10.1111/bdi.13086</a> . Available from: <a href="https://onlinelibrary.wiley.com/doi/epdf/10.1111/bdi.13086">https://onlinelibrary.wiley.com/doi/epdf/10.1111/bdi.13086</a> .                                                                                                                                                                                                                                                                          | Was not a CPG                   |
| 70. CANADIAN AGENCY FOR DRUGS AND TECHNOLOGIES IN HEALTH. Antidepressants administered using weight-based dosing strategies for depression: clinical effectiveness and guidelines. [Ottawa, ON]: CADTH; 2020. Available from: <a href="https://www.cadth.ca/antidepressants-administered-using-weight-based-dosing-strategies-depression-clinical-effectiveness">https://www.cadth.ca/antidepressants-administered-using-weight-based-dosing-strategies-depression-clinical-effectiveness</a> .                                                                                                                                                                                                                   | Was not a CPG                   |

| Reference of the excluded CPG                                                                                                                                                                                                                                                                                                                                                                                                                        | Reasons for exclusion |
|------------------------------------------------------------------------------------------------------------------------------------------------------------------------------------------------------------------------------------------------------------------------------------------------------------------------------------------------------------------------------------------------------------------------------------------------------|-----------------------|
| 71. Li KX, Loshak H. Intravenous Ketamine for Adults with Treatment-Resistant Depression or Post-Traumatic Stress Disorder: A Review of Clinical Effectiveness, Cost-Effectiveness and Guidelines [Internet]. Ottawa (ON): Canadian Agency for Drugs and Technologies in Health, 2019 Oct 24. PMID: 31873996.                                                                                                                                        | Was not a CPG         |
| 72. Testosterone for depression, PTSD, or fibromyalgia: Clinical effectiveness and guidelines. Ottawa: CADTH, 2017, Feb. (CADTH rapid response report: reference list).                                                                                                                                                                                                                                                                              | Was not a CPG         |
| 73. CANADIAN AGENCY FOR DRUGS AND TECHNOLOGIES IN HEALTH. <b>Monoamine oxidase inhibitors in elderly patients:</b> clinical effectiveness and guidelines. [Ottawa, ON]: CADTH, 2015. Available from: <a href="https://www.cadth.ca/sites/default/files/thisfile/htis/aug-2015/RA0792%20MAOIs%20in%20the%20Elderly%20Final.pdf">https://www.cadth.ca/sites/default/files/thisfile/htis/aug-2015/RA0792%20MAOIs%20in%20the%20Elderly%20Final.pdf</a> . | Was not a CPG         |
| 74. Alexopoulos GS. Pharmacotherapy for late-life depression. <i>J Clin Psychiatry</i> 2011, 72(1):e04. DOI:10.4088/JCP.7085tx2cj.                                                                                                                                                                                                                                                                                                                   | Was not a CPG         |
| 75. Andreescu C, Reynolds CF III. Late-life depression: evidencebased treatment and promising new directions for research and clinical practice. <i>Psychiatr Clin North Am</i> 2011, 34(2):335-55. DOI:10.1016/j.psc.2011.02.005.                                                                                                                                                                                                                   | Was not a CPG         |
| 76. Arnow BA, Steidtmann D, Blasey C, <i>et al.</i> The relationship between the therapeutic alliance and treatment outcome in two distinct psychotherapies for chronic depression. <i>J Consult Clin Psychol</i> 2013, 81(4):627-38. DOI:10.1037/a0031530.                                                                                                                                                                                          | Was not a CPG         |
| 77. Ayub-Dargél A, Masson M, Henry C. The RANZCP guidelines: managing mood disorders in the real world. <i>Aust N Z J Psychiatry</i> 2016, 50(12): 1198-9. DOI:10.1177/0004867416676373.                                                                                                                                                                                                                                                             | Was not a CPG         |
| 78. Bland P. Raising standards of care for patients with depression. <i>Practitioner</i> 2011, 255(1740):21-5.                                                                                                                                                                                                                                                                                                                                       | Was not a CPG         |
| 79. Boffin N, Bossuyt N, Declercq T, <i>et al.</i> Incidence, patient characteristics and treatment initiated for GP-diagnosed depression in general practice: results of a 1-year nationwide surveillance study. <i>Fam Prac</i> 2012, 29(6):678-87. DOI:10.1093/fampra/cms024.                                                                                                                                                                     | Was not a CPG         |
| 80. Bohra HM, Novak M. Depression in patients with chronic kidney disease. <i>CANNT J</i> 2015, 25(3):34-8.                                                                                                                                                                                                                                                                                                                                          | Was not a CPG         |
| 81. Cohen A. The QOF, NICE, and depression. <i>Br J Gen Pract</i> 2011, 61(590):549. DOI:10.3399/bjgp11X593785.                                                                                                                                                                                                                                                                                                                                      | Was not a CPG         |
| 82. Baumann S, Benson-Martin J, Cossie Q, <i>et al.</i> SASOP treatment guidelines for psychiatric disorders: eminence or evidence based? <i>S Afr J Psychiatr</i> 2019, 20(2):a529. DOI 10.4102/sajpsychiatry.v20i2.529.                                                                                                                                                                                                                            | Was not a CPG         |
| 83. Cosgrove L, Shaughnessy AF, Wheeler EE, <i>et al.</i> The American Psychiatric Association's guideline for major depressive disorder: a commentary. <i>Psychother Psychosom</i> 2012, 81(3):186-8. DOI:10.1159/000335523.                                                                                                                                                                                                                        | Was not a CPG         |



| Reference of the excluded CPG                                                                                                                                                                                                                                                                                                                                                   | Reasons for exclusion |
|---------------------------------------------------------------------------------------------------------------------------------------------------------------------------------------------------------------------------------------------------------------------------------------------------------------------------------------------------------------------------------|-----------------------|
| 84. Cuijpers P. Effective therapies or effective mechanisms in treatment guidelines for depression? <i>Depress Anxiety</i> 2013, 30(11):1055-7. DOI:10.1002/da.22205.                                                                                                                                                                                                           | Was not a CPG         |
| 85. Cuijpers P. Combined pharmacotherapy and psychotherapy in the treatment of mild to moderate major depression? <i>JAMA Psychiatry</i> 2014, 71(7):747-8. DOI:10.1001/jamapsychiatry.2014.277.                                                                                                                                                                                | Was not a CPG         |
| 86. De Coteau PA, Byrne CD, Russell, V. The HSE/ICGP guidelines on the management of depression and anxiety disorders in primary care. <i>Ir Med J</i> 2012, 105(7):251.                                                                                                                                                                                                        | Was not a CPG         |
| 87. Desseilles M, Witte J, Chang TE, <i>et al.</i> Assessing the adequacy of past antidepressant trials: a clinician's guide to the antidepressant treatment response questionnaire. <i>J Clin Psychiatry</i> 2011, 72(8):1152-4. DOI:10.4088/JCP.11ac07225.                                                                                                                    | Was not a CPG         |
| 88. Canadian Agency for Drugs and Technologies in Health. Diagnosing, Screening, and Monitoring Depression in the Elderly: A Review of Guidelines. Ottawa, ON: CADTH, 2015.                                                                                                                                                                                                     | Was not a CPG         |
| 89. Canadian Agency for Drugs and Technologies in Health. Antidepressants in Elderly Patients with Major and Minor Depression: A Review of Clinical Effectiveness and Guidelines. Ottawa, ON: CADTH, 2015.                                                                                                                                                                      | Was not a CPG         |
| 90. Gensichen J, Härter M, Klesse C, <i>et al.</i> Germany's national clinical practice guideline (S3) for unipolar depression—What is important for family practice? <i>ZFA</i> 2011, 87(5):223-30. DOI:10.3238/zfa.2011.0223.                                                                                                                                                 | Was not a CPG         |
| 91. GEOFFROY, P. A., BELLIVIER, F. The RANZCP mood disorders guidelines: an easy step-by-step toolbox for daily practice. <i>Australian and New Zealand Journal of Psychiatry</i> , Melbourne, v. 50, n. 10, p. 1014-5. DOI Available from: <a href="https://journals.sagepub.com/doi/10.1177/0004867416667829">https://journals.sagepub.com/doi/10.1177/0004867416667829</a> . | Was not a CPG         |
| 92. Gitlin M. The Royal Australian and New Zealand College of Psychiatrists clinical guidelines for mood disorders: kudos and quarrels. <i>Aust NZ Psychiatry</i> 2016, 50(10):937-8. DOI:10.1177/0004867416668038.                                                                                                                                                             | Was not a CPG         |
| 93. Grobler, G. An overview of depression treatment guidelines. Abstracts 2nd African College of Neuropsychopharmacology Congress 30-31 July 2016 Stellenbosch, Western Cape, South Africa. <i>Acta Neuropsychiatr</i> 2016, 28(s3):1-15. DOI:10.1017/neu.2016.37.                                                                                                              | Was not a CPG         |
| 94. Heilmann KE, Wagner M, Riedel-Heller S, <i>et al.</i> Treating late life depression with antidepressants: a summary of recommendations in international guidelines. <i>Fortschr Neurol Psychiatr</i> 2015, 83(7):381-91. DOI:10.1055/s-0035-1553315.                                                                                                                        | Was not a CPG         |
| 95. Horgan D, Dodd S. Combination antidepressants—use by GPs and psychiatrists. <i>Aust Fam Physician</i> 2011, 40(6):397-400.                                                                                                                                                                                                                                                  | Was not a CPG         |

| Reference of the excluded CPG                                                                                                                                                                                                                                                                                                                                                                                                                                        | Reasons for exclusion           |
|----------------------------------------------------------------------------------------------------------------------------------------------------------------------------------------------------------------------------------------------------------------------------------------------------------------------------------------------------------------------------------------------------------------------------------------------------------------------|---------------------------------|
| 96. KASPER, S. Editorial. World Journal of Biological Psychiatry, Glasgow, v. 14, n. 5, p. 333. DOI <a href="https://doi.org/10.3109/15622975.2013.819703">https://doi.org/ 10.3109/15622975.2013.819703</a> . Available from: <a href="https://www.tandfonline.com/doi/full/10.3109/15622975.2013.819703">https://www.tandfonline.com/doi/full/10.3109/15622975.2013.819703</a> .                                                                                   | Was not a CPG                   |
| 97. Kendall T, Pilling S, Glover N, <i>et al.</i> Guidelines in ment–l health - national and international perspectives. Int Rev Psychiatry 2011, 23(4):314-7. DOI:10.3109/09540261.2011.607431.                                                                                                                                                                                                                                                                     | Was not a CPG                   |
| 98. Kongsuk T. Clinical practice guideline major depressive disorder for general practitioners. Value Health 2013, 16(7): A695. DOI:10.1016/j.jval.2013.08.2091.                                                                                                                                                                                                                                                                                                     | Was not a CPG                   |
| 99. KURIAN, B. T., GRANNEMANN, B., TRIVEDI, M. H. Feasible evidence-based strategies to manage depression in primary care. <b>Current Psychiatry Reports</b> , Philadelphia, v. 14, n. 4, p. 370-375. DOI: <a href="https://doi.org/10.1007/s11920-0120290-y">https://doi.org/10.1007/s11920-0120290-y</a> . Available from: <a href="https://link.springer.com/article/10.1007/s11920-012-0290-y">https://link.springer.com/article/10.1007/s11920-012-0290-y</a> . | Was not a CPG                   |
| 100. Laux G. Update treatment of depression—S3 Guideline, internet-based psychotherapy, antidepressants and driving ability. Nervenheilkunde 2016, 35(10):691-6. DOI:10.1055/s-0037-1616433.                                                                                                                                                                                                                                                                         | Was not a CPG                   |
| 101. FACULTY OF SEXUAL AND REPRODUCTIVE HEALTHCARE OF THE ROYAL COLLEGE OF OBSTETRICIANS AND GYNEACOLOGISTS. The relationship between progestin hormonal contraception and depression: a systematic review. [London]: 6 March 2018. Available from: <a href="https://www.fsrh.org/news/fsrh-ceu-statement-response-to-study-on-progestogen-only/">https://www.fsrh.org/news/fsrh-ceu-statement-response-to-study-on-progestogen-only/</a> .                          | Was not a CPG                   |
| 102. FACULTY OF SEXUAL AND REPRODUCTIVE HEALTHCARE OF THE ROYAL COLLEGE OF OBSTETRICIANS AND GYNEACOLOGISTS. FSRH CEU Statement: response to study on progestogen-only contraception use and depression [London]: FSRH; 8 March 2018. Available from: <a href="https://www.fsrh.org/news/fsrh-ceu-statement-response-to-study-on-progestogen-only/">https://www.fsrh.org/news/fsrh-ceu-statement-response-to-study-on-progestogen-only/</a> .                        | Was not a CPG                   |
| 103. Leadholm AKK, Rothschild AJ, Nolen WA <i>et al.</i> The treatment of psychotic depression: is there consensus among guidelines and psychiatrists? J Affect Disord 145(2): 214-20. DOI:10.1016/j.jad.2012.07.036.                                                                                                                                                                                                                                                | Focused on specific populations |
| 104. Malhi G, Oakley-Browne M, Hay P. Clinical practice guidelines project (CPG project) overview. Aust NZ JPsychiatr 2015, 49(Supp 1):30. DOI:10.1177/0004867415578344.                                                                                                                                                                                                                                                                                             | Was not a CPG                   |
| 105. Manning JS, Jackson WC. Providing guideline-concordant assessment and monitoring for major depression in primary care. J Clin Psychiatry 2015, 76(1):e3. DOI:10.4088/JCP.13013tx7c.                                                                                                                                                                                                                                                                             | Was not a CPG                   |
| 106. Morris DW, Trivedi MH. Measurement-based care for unipolar depression. Curr Psychiatry Rep 2011, 13(6):446-58. DOI:10.1007/s11920-011-0237-8.                                                                                                                                                                                                                                                                                                                   | Was not a CPG                   |

| Reference of the excluded CPG                                                                                                                                                                                                                                                                                                                                                                                                                                     | Reasons for exclusion           |
|-------------------------------------------------------------------------------------------------------------------------------------------------------------------------------------------------------------------------------------------------------------------------------------------------------------------------------------------------------------------------------------------------------------------------------------------------------------------|---------------------------------|
| 107. Nelson JC. Foreword. CNSDrugs 2013, 27:3-4. DOI:10.1007/s40263-012-0027-9.                                                                                                                                                                                                                                                                                                                                                                                   | Was not a CPG                   |
| 108. Nutt DJ. Highlights of the international consensus statement on major depressive disorder. J Clin Psychiatry 2011, 72(6):e21. DOI:10.4088/JCP.9058tx2c.                                                                                                                                                                                                                                                                                                      | Was not a CPG                   |
| 109. Ogasawara K, Ozaki N. Review of the new treatment guideline for major depressive disorder by the Japanese Society of Mood Disorders. Brain Nerve 2012, 64(10):1159-65. In Japanese.                                                                                                                                                                                                                                                                          | Was not a CPG                   |
| 110. Oldham J. Fine-tuning our treatment strategies. J Psychiatr Pract 2011, 17(3):157. DOI:10.1097/01.pra.0000398408.13750.8d.                                                                                                                                                                                                                                                                                                                                   | Was not a CPG                   |
| 111. Pai N. Are the Royal Australian and New Zealand College of Psychiatrists clinical practice guidelines for mood disorders meeting the needs of clinicians? Aust N Z J Psychiatry 2016, 50(10):1015-6. DOI:10.1177/0004867416667828.                                                                                                                                                                                                                           | Was not a CPG                   |
| 112. Patkar AA, Pae C-U. Atypical antipsychotic augmentation strategies in the context of guideline-based care for the treatment of major depressive disorder. CNS Drugs 2013, 27(Suppl 1):S29-S37. DOI:10.1007/s40263-012-0031-0.                                                                                                                                                                                                                                | Was not a CPG                   |
| 113. Rawlins M. Ten years of NICE mental health guidelines. Int Rev Psychiatry 2011, 23(4):311-3. DOI:10.3109/09540261.2011.606804.                                                                                                                                                                                                                                                                                                                               | Was not a CPG                   |
| 114. Reisdorf S. Revision of the national health care guidelines on unipolar depression. MedMonatss Pharm 2016, 39(4):171-2.                                                                                                                                                                                                                                                                                                                                      | Was not a CPG                   |
| 115. Roberge P, Fournier L, Brouillet H, <i>et al.</i> A provincial adaptation of clinical practice guidelines for depression in primary care: a case illustration of the ADAPTE method. J Eval Clin Pract 2015, 21(6):1190-8. DOI:10.1111/jep.12404.                                                                                                                                                                                                             | Was not a CPG                   |
| 116. Schuklenk U, Vathorst SVD. Treatment-resistant major depressive disorder and assisted dying. J Med Ethics 2015, 41(8), 577-83. DOI:10.1136/medethics-2014-102458.                                                                                                                                                                                                                                                                                            | Was not a CPG                   |
| 117. Schulte-Korne G, Krick K. In reply. Dtsch Arztebl Int 2014, 111(18):330. DOI:10.3238/arztebl.2014.0330c.                                                                                                                                                                                                                                                                                                                                                     | Was not a CPG                   |
| 118. Tomba E, Fava GA. Treatment selection in depression: the role of clinical judgment. Psychiatr Clin North Am 2012, 35(1):87-98. DOI:10.1016/j.psc.2011.11.003.                                                                                                                                                                                                                                                                                                | Was not a CPG                   |
| 119. TREUER, T., <i>et al.</i> Use of antidepressants in the treatment of depression in Asia: guidelines, clinical evidence, and experience revisited. <i>Asia-Pacific Psychiatry</i> , Richmond, v. 5, n. 4, p. 219-230. DOI <a href="https://doi.org/10.1111/appy.12090">https://doi.org/10.1111/appy.12090</a> . Available from: <a href="https://onlinelibrary.wiley.com/doi/10.1111/appy.12090">https://onlinelibrary.wiley.com/doi/10.1111/appy.12090</a> . | Was not a CPG                   |
| 120. Tundo A, Calabrese JR, Proietti L, <i>et al.</i> Short-term antidepressant treatment of bipolar depression: are ISBD recommendations useful in clinical practice? J Affect Disord 2015, 171:155-60. doi:10.1016/j.jad.2014.09.019.                                                                                                                                                                                                                           | Focused on specific populations |

| Reference of the excluded CPG                                                                                                                                                                                                                                                                                                                                                                                                                                                | Reasons for exclusion                     |
|------------------------------------------------------------------------------------------------------------------------------------------------------------------------------------------------------------------------------------------------------------------------------------------------------------------------------------------------------------------------------------------------------------------------------------------------------------------------------|-------------------------------------------|
| 121. Van Avendonk M, van Weel-Baumgarten E, van der Weele G, <i>et al.</i> Summary of the Dutch College of General Practitioners' practice guideline "Depression". <i>Ned Tijdschr Geneesk</i> 2012, 156(38):A5101.                                                                                                                                                                                                                                                          | Was not a CPG                             |
| 122. Vinberg M, Levinsen MF, Kessing LV. Treatment-resistant depression is treatable. <i>Ugeskr Laeger</i> 2011, 173(9):651-4.                                                                                                                                                                                                                                                                                                                                               | Was not a CPG                             |
| 123. Xiang YT, Hu C, Wang G, <i>et al.</i> Prescribing patterns of antidepressants, antipsychotics and mood stabilizers in bipolar patients misdiagnosed with major depressive disorder in China. <i>Hum Psychopharmacol</i> 2012, 27(6):626-31. DOI:10.1002/hup.2262.                                                                                                                                                                                                       | Was not a CPG                             |
| 124. YANG, J. <i>et al.</i> Experiences and barriers to implementation of clinical practice guideline for depression in Korea. <i>BMC Psychiatry</i> , London, v. 13, p. 150. DOI: <a href="https://doi.org/10.1186/1471-244X-13-150">https://doi.org/10.1186/1471-244X-13-150</a> . Available from: <a href="https://bmcp psychiatry.biomedcentral.com/articles/10.1186/1471-244X-13-150">https://bmcp psychiatry.biomedcentral.com/articles/10.1186/1471-244X-13-150</a> . | Was not a CPG                             |
| 125. Zimmerman M. Symptom severity and guideline-based treatment recommendations for depressed patients: implications of DSM-5's potential recommendation of the PHQ-9 as the measure of choice for depression severity. <i>Psychother Psychosom</i> 2012, 81(6):329-32. DOI:10.1159/000342262.                                                                                                                                                                              | Was not a CPG                             |
| 126. Zimmerman M, Martinez JH, Friedman M, <i>et al.</i> How can we use depression severity to guide treatment selection when measures of depression categorize patients differently? <i>J Clin Psychiatry</i> 2012, 73(10):1287-91. DOI:10.4088/JCP.12m07775.                                                                                                                                                                                                               | Was not a CPG                             |
| 127. Herrmann M, Gensichen J. Guidelines in general practice: the example depression. <i>Psychiatrie</i> 2015, 66:119-24.                                                                                                                                                                                                                                                                                                                                                    | Was not a CPG                             |
| 128. Kuroki T, Tanaka T. [Threshold of application of antidepressant drugs for treatment of depressive disorder]. <i>Seishin Shinkeigaku Zasshi</i> 2015,117(4):269-76. In Japanese.                                                                                                                                                                                                                                                                                         | Was not a CPG                             |
| 129. Semba J. [Proper use of novel antidepressants in psychiatric clinical practice]. <i>Seishin Shinkeigaku Zasshi</i> . 2014,116(2):138-143. In Japanese.                                                                                                                                                                                                                                                                                                                  | Was not a CPG                             |
| 130. Sforzini, L., Worrell, C., Kose, M. <i>et al.</i> A Delphi-method-based consensus guideline for definition of treatment-resistant depression for clinical trials. <i>Mol Psychiatry</i> (2021). <a href="https://doi.org/10.1038/s41380-021-01381-x">https://doi.org/10.1038/s41380-021-01381-x</a> .                                                                                                                                                                   | Did not include pharmacological treatment |
| 131. McAllister-Williams RH, Arango C, Blier P, Demyttenaere K, Falkai P, Gorwood P, Hopwood M, Javed A, Kasper S, Malhi GS, Soares JC, Vieta E, Young AH, Papadopoulos A, Rush AJ. The identification, assessment and management of difficult-to-treat depression: An international consensus statement. <i>J Affect Disord</i> . 2020 Apr 15, 267:264-282. DOI: 10.1016/j.jad.2020.02.023. Epub 2020 Feb 7. PMID: 32217227.                                                | Was not a CPG                             |

| Reference of the excluded CPG                                                                                                                                                                                                                                                                                                                                                                                                                                                                                                                                                                                                                                                                                                          | Reasons for exclusion |
|----------------------------------------------------------------------------------------------------------------------------------------------------------------------------------------------------------------------------------------------------------------------------------------------------------------------------------------------------------------------------------------------------------------------------------------------------------------------------------------------------------------------------------------------------------------------------------------------------------------------------------------------------------------------------------------------------------------------------------------|-----------------------|
| 132. Lu, S., Li, W., Oldenburg, B. <i>et al.</i> Cultural adaptation of the mental health first aid guidelines for depression used in English-speaking countries for China: a Delphi expert consensus study. <i>BMC Psychiatry</i> 20, <a href="https://doi.org/10.1186/s12888-020-02736-4">336 (2020)</a> . <a href="https://doi.org/10.1186/s12888-020-02736-4">https://doi.org/10.1186/s12888-020-02736-4</a> .                                                                                                                                                                                                                                                                                                                     | Was not a CPG         |
| 133. Taylor RW, Marwood L, Oprea E, DeAngel V, Mather S, Valentini B, Zahn R, Young AH, Cleare AJ. Pharmacological Augmentation in Unipolar Depression: A Guide to the Guidelines. <i>Int J Neuropsychopharmacol.</i> 2020 Dec 3, 23(9):587-625. DOI: 10.1093/ijnp/pyaa033. PMID: 32402075; PMCID: PMC7710919.                                                                                                                                                                                                                                                                                                                                                                                                                         | Was not a CPG         |
| 134. Andrade C. Oral racemic ketamine for common clinical contexts in patients with major depressive disorder: An important intervention that treatment guidelines may never include. <i>Bipolar Disord.</i> 2022 Mar, 24(2):113-114. DOI: 10.1111/bdi.13155. Epub 2021 Nov 23. PMID: 34816542.                                                                                                                                                                                                                                                                                                                                                                                                                                        | Was not a CPG         |
| 135. CANADIAN AGENCY FOR DRUGS AND TECHNOLOGIES IN HEALTH. Accessing mental health support outside of a therapist's office: iCBT for major depression and anxiety disorders. [Ottawa, ON]: CADTH, [2020]. Available from: <a href="https://www.cadth.ca/events/evidence-action-accessing-mental-health-support-outside-therapists-office-icbt-major">https://www.cadth.ca/events/evidence-action-accessing-mental-health-support-outside-therapists-office-icbt-major</a> .                                                                                                                                                                                                                                                            | Subject matter        |
| 136. NATIONAL INSTITUTE FOR HEALTH AND CARE EXCELLENCE. Common mental health problems: identification and pathways to care. <b>London: NICE, 2011. Available from:</b> <a href="https://www.nice.org.uk/guidance/cg123">https://www.nice.org.uk/guidance/cg123</a> .                                                                                                                                                                                                                                                                                                                                                                                                                                                                   | Subject matter        |
| 137. HAUTE AUTORITÉ DE SANTÉ. Dangersité psychiatrique: étude et évaluation des facteurs de risque de violence hétéro-agressive chez les personnes ayant des troubles schizophréniques ou des troubles de l'humeur. Saint-Denis, 2011. Available from: <a href="https://www.has-sante.fr/jcms/c_1069220/fr/dangerosite-psychiatrique-etude-et-evaluation-des-facteurs-de-risque-de-violence-hetero-agressive-chez-les-personnes-ayant-des-troubles-schizophreniques-ou-des-troubles-de-l-humeur">https://www.has-sante.fr/jcms/c_1069220/fr/dangerosite-psychiatrique-etude-et-evaluation-des-facteurs-de-risque-de-violence-hetero-agressive-chez-les-personnes-ayant-des-troubles-schizophreniques-ou-des-troubles-de-l-humeur</a> . | Subject matter        |
| 138. Arbejdsgruppen vedr. den nationale kliniske retningslinje for farmakologisk behandling af bipolar lidelse. National klinisk retningslinje for farmakologisk behandling af bipolar lidelse: supplerende vedligeholdelsesbehandling efter depression. Version 27. maj 2014 udg. København: Sundhedsstyrelsen, 2014. 111 s.                                                                                                                                                                                                                                                                                                                                                                                                          | Subject matter        |
| 139. Shelton RC, Trivedi MH. Using algorithms and computerized decision support systems to treat major depression. <i>J Clin Psychiatry.</i> 2011 Dec, 72(12):e36. DOI: 10.4088/JCP.10027tx4cc. PMID: 22244032.                                                                                                                                                                                                                                                                                                                                                                                                                                                                                                                        | Was not a CPG         |
| 140. Lam RW, Parikh SV, Michalak EE, Dewa CS, Kennedy SH. Canadian Network for Mood and Anxiety Treatments (CANMAT) consensus recommendations for functional outcomes in major depressive disorder. <i>Ann Clin Psychiatry.</i> 2015 May, 27(2):142-9. PMID: 25954941.                                                                                                                                                                                                                                                                                                                                                                                                                                                                 | Subject matter        |

| Reference of the excluded CPG                                                                                                                                                                                                                                                                                                                                                                                                                                                                                                                                              | Reasons for exclusion                     |
|----------------------------------------------------------------------------------------------------------------------------------------------------------------------------------------------------------------------------------------------------------------------------------------------------------------------------------------------------------------------------------------------------------------------------------------------------------------------------------------------------------------------------------------------------------------------------|-------------------------------------------|
| 141. Human growth hormone for depression, post-traumatic stress disorder, or fibromyalgia: Clinical effectiveness and guidelines. Ottawa: CADTH, 2017 Feb. (CADTH rapid response report: reference list).                                                                                                                                                                                                                                                                                                                                                                  | Subject matter                            |
| 142. Yamada K. [Evidence of treatment for depressive episodes of bipolar disorder]. <i>Seishin Shinkeigaku Zasshi</i> 2011, 113(9):873-9. In Japanese.                                                                                                                                                                                                                                                                                                                                                                                                                     | Subject matter                            |
| 143. Depression. Adapted Evidence-based Guideline. Ukraine, 2014.                                                                                                                                                                                                                                                                                                                                                                                                                                                                                                          | Was not a CPG                             |
| 144. Siu AL, US Preventive Services Task Force (USPSTF). Screening for depression in adults: US Preventive Services Task Force recommendation statement. <i>JAMA</i> 2016, 315(4):380-7. DOI:10.1001/jama.2015.18392.                                                                                                                                                                                                                                                                                                                                                      | Did not include pharmacological treatment |
| 145. Thase ME. Recommendations for screening for depression in adults. <i>JAMA</i> 2016, 315(4):349-50. DOI:10.1001/jama.2015.18406.                                                                                                                                                                                                                                                                                                                                                                                                                                       | Did not include pharmacological treatment |
| 146. CANADIAN AGENCY FOR DRUGS AND TECHNOLOGIES IN HEALTH. Internet-Delivered Cognitive Behavioural Therapy (iCBT) programs for major depression and anxiety disorders in Canada. Ottawa, ON: CADTH, 2020. Available from: <a href="https://www.cadth.ca/internet-delivered-cognitive-behavioural-therapy-icbt-programs-major-depression-and-anxiety">https://www.cadth.ca/internet-delivered-cognitive-behavioural-therapy-icbt-programs-major-depression-and-anxiety</a>                                                                                                 | Did not include pharmacological treatment |
| 147. Guided Versus Unguided Internet-Delivered Cognitive Behavioural Therapy for Major Depressive Disorder and Anxiety Disorders: Comparative Clinical Effectiveness. Ottawa: CADTH, 2018 Oct. (CADTH rapid response report: summary of abstracts).                                                                                                                                                                                                                                                                                                                        | Did not include pharmacological treatment |
| 148. Pohar R, Argáez C. Acceptance and Commitment Therapy for Post-Traumatic Stress Disorder, Anxiety, and Depression: A Review of Clinical Effectiveness [Internet]. Ottawa (ON): Canadian Agency for Drugs and Technologies in Health, 2017 Aug 28. PMID: 30226695.                                                                                                                                                                                                                                                                                                      | Did not include pharmacological treatment |
| 149. CANADIAN AGENCY FOR DRUGS AND TECHNOLOGIES IN HEALTH. Mindfulness interventions for the treatment of post-traumatic stress disorder, generalized anxiety disorder, depression, and substance use disorders: a review of the clinical effectiveness and guidelines. Ottawa, ON: CADTH, 2015. Available from: <a href="https://www.cadth.ca/mindfulness-interventions-treatment-post-traumatic-stress-disorder-generalized-anxiety-disorder">https://www.cadth.ca/mindfulness-interventions-treatment-post-traumatic-stress-disorder-generalized-anxiety-disorder</a> . | Did not include pharmacological treatment |
| 150. Yoga for the Treatment of Post-Traumatic Stress Disorder, Generalized Anxiety Disorder, Depression, and Substance Abuse: A Review of the Clinical Effectiveness and Guidelines [Internet]. Ottawa (ON): Canadian Agency for Drugs and Technologies in Health, 2015 Jun 22. Available from: <a href="https://www.ncbi.nlm.nih.gov/books/NBK304560/">https://www.ncbi.nlm.nih.gov/books/NBK304560/</a> .                                                                                                                                                                | Did not include pharmacological treatment |

| Reference of the excluded CPG                                                                                                                                                                                                                                                                                                                                                                                                                                                                        | Reasons for exclusion                     |
|------------------------------------------------------------------------------------------------------------------------------------------------------------------------------------------------------------------------------------------------------------------------------------------------------------------------------------------------------------------------------------------------------------------------------------------------------------------------------------------------------|-------------------------------------------|
| 151. Health Quality Ontario. Internet-Delivered Cognitive Behavioural Therapy for Major Depression and Anxiety Disorders: A Health Technology Assessment. <i>Ont Health Technol Assess Ser.</i> 2019- Feb 19, 19(6):1-199. PMID: 30873251; PMCID: PMC6394534.                                                                                                                                                                                                                                        | Did not include pharmacological treatment |
| 152. Bright Light Therapy for Depression: Clinical Effectiveness. Ottawa: CADTH, 2019 Aug. (CADTH rapid response report: summary of abstracts).                                                                                                                                                                                                                                                                                                                                                      | Did not include pharmacological treatment |
| 153. Physical activity and support programs for mild to moderate major depressive disorder. (CADTH reference list). Ottawa: CADTH, 2021 November.                                                                                                                                                                                                                                                                                                                                                    | Did not include pharmacological treatment |
| 154. CANADIAN AGENCY FOR DRUGS AND TECHNOLOGIES IN HEALTH. Diagnosing, screening, and monitoring depression in the elderly: a review of guidelines. Ottawa, ON: CADTH, 2015.                                                                                                                                                                                                                                                                                                                         | Did not include pharmacological treatment |
| 155. CANADIAN AGENCY FOR DRUGS AND TECHNOLOGIES IN HEALTH. Stellate ganglion block for the treatment of post-traumatic stress disorder, depression, and anxiety. Ottawa, ON: CADTH, 2021. Available from: <a href="https://www.cadth.ca/stellate-ganglion-block-treatment-post-traumatic-stress-disorder-depression-and-anxiety">https://www.cadth.ca/stellate-ganglion-block-treatment-post-traumatic-stress-disorder-depression-and-anxiety</a> .                                                  | Did not include pharmacological treatment |
| 156. Pharmacogenomic testing in depression: a review of clinical effectiveness, cost-effectiveness, and guidelines. Ottawa: CADTH, 2020 Jan. (CADTH rapid response report: summary with critical appraisal).                                                                                                                                                                                                                                                                                         | Did not include pharmacological treatment |
| 157. CANADIAN AGENCY FOR DRUGS AND TECHNOLOGIES IN HEALTH. <b>Repetitive transcranial magnetic stimulation for depression</b> : a review of the clinical effectiveness, cost-effectiveness, and guidelines. Ottawa, ON: CADTH, 2021. Available from: <a href="https://www.cadth.ca/repetitive-transcranial-magnetic-stimulation-depression-review-clinical-effectiveness-cost">https://www.cadth.ca/repetitive-transcranial-magnetic-stimulation-depression-review-clinical-effectiveness-cost</a> . | Did not include pharmacological treatment |
| 158. Health Quality Ontario. Internet-Delivered Cognitive Behavioural Therapy for Major Depression and Anxiety Disorders: A Health Technology Assessment. <i>Ont Health Technol Assess Ser.</i> 2019 Feb 19, 19(6):1-199. PMID: 30873251; PMCID: PMC6394534.                                                                                                                                                                                                                                         | Did not include pharmacological treatment |
| 159. NATIONAL KLINISK RETNINGSLINJE FOR NON-FARMAKOLOGISK BEHANDLING AF UNIPOLAR DEPRESSION. Available from: <a href="https://www.sst.dk/da/udgivelser/2016/~media/0216564bb8aa4d40b7dbaf21e9acf403.ashx">https://www.sst.dk/da/udgivelser/2016/~media/0216564bb8aa4d40b7dbaf21e9acf403.ashx</a> .                                                                                                                                                                                                   | Did not include pharmacological treatment |
| 160. Joffres M, Jaramillo A, Dickinson J, <i>et al.</i> Recommendations on screening for depression in adults [published correction appears in <i>CMAJ.</i> 2013 Sep 3, 185(12):1067]. <i>CMAJ.</i> 2013;185(9):775-782. DOI:10.1503/cmaj.130403.                                                                                                                                                                                                                                                    | Did not include pharmacological treatment |

| Reference of the excluded CPG                                                                                                                                                                                                                                                                                                                                                                                                                                                                                                                                                                                    | Reasons for exclusion                     |
|------------------------------------------------------------------------------------------------------------------------------------------------------------------------------------------------------------------------------------------------------------------------------------------------------------------------------------------------------------------------------------------------------------------------------------------------------------------------------------------------------------------------------------------------------------------------------------------------------------------|-------------------------------------------|
| 161. Andersen, B. L., DeRubeis, R. J., Berman, B. S., Gruman, J., Champion, V. L., Massie, M. J., Holland, J. C., Partridge, A. H., Bak, K., Somerfield, M. R., Rowland, J. H., & American Society of Clinical Oncology (2014). Screening, assessment, and care of anxiety and depressive symptoms in adults with cancer: an American Society of Clinical Oncology guideline adaptation. <i>Journal of clinical oncology: official journal of the American Society of Clinical Oncology</i> , 32(15), 1605–1619. <a href="https://doi.org/10.1200/JCO.2013.52.4611">https://doi.org/10.1200/JCO.2013.52.4611</a> | Did not include pharmacological treatment |
| 162. Implanted vagus nerve stimulation for treatment-resistant depression. Available from: <a href="https://www.nice.org.uk/guidance/ipg679">https://www.nice.org.uk/guidance/ipg679</a> .                                                                                                                                                                                                                                                                                                                                                                                                                       | Did not include pharmacological treatment |
| 163. FROST, J. <i>et al.</i> Depression following acute coronary syndrome events: screening and treatment guidelines from the AAFP. <i>American Family Physician</i> , Kansas City, MO, v. 99, n. 12, online. Available from: <a href="https://www.aafp.org/afp/2019/0615/od2.html">https://www.aafp.org/afp/2019/0615/od2.html</a> .                                                                                                                                                                                                                                                                            | Focused on specific populations           |
| 164. Noe KH, Locke DE, Sirven JI. Treatment of depression in patients with epilepsy. <i>Curr Treat Options Neurol</i> . 2011 Aug;13(4):371-9. DOI: 10.1007/s11940-011-0127-8. PMID: 21472437.                                                                                                                                                                                                                                                                                                                                                                                                                    | Focused on specific populations           |
| 165. Rayner L, Price A, Hotopf M, <i>et al.</i> The development of evidence-based European guidelines on the management of depression in palliative cancer care. <i>Eur J Cancer</i> 2011, 47(5):702-12. DOI:10.1016/j.ejca.2010.11.027.                                                                                                                                                                                                                                                                                                                                                                         | Focused on specific populations           |
| 166. Williams D, Mierzwinski-Urban M. Adapted or Tailored Psychological Interventions for Treating Women with Mental Illness: A Review of Clinical Effectiveness and Guidelines [Internet]. Ottawa (ON): Canadian Agency for Drugs and Technologies in Health, 2017 Oct 5. Available from: <a href="https://www.ncbi.nlm.nih.gov/books/NBK525628/">https://www.ncbi.nlm.nih.gov/books/NBK525628/</a> .                                                                                                                                                                                                           | Focused on specific populations           |
| 167. WORLD HEALTH ORGANIZATION. <b>Pharmacological interventions (antidepressants) for 433 people with dementia who have associated depression</b> . Geneva: WHO, 2015. Available from: <a href="https://www.who.int/mental_health/mhgap/evidence/emmentia/q4/en/">https://www.who.int/mental_health/mhgap/evidence/emmentia/q4/en/</a> .                                                                                                                                                                                                                                                                        | Focused on specific populations           |
| 168. Austin M-P, Hight N, The Expert Working Group. <i>Mental Health Care in the Perinatal Period: Australian Clinical Practice Guideline</i> . Melbourne, Australia: Centre of Perinatal Excellence, 2017.                                                                                                                                                                                                                                                                                                                                                                                                      | Focused on specific populations           |
| 169. Colquhoun DM, Bunker SJ, Clarke DM, <i>et al.</i> Screening, referral and treatment for depression in patients with coronary heart disease. <i>Med J Aust</i> 2013, 198(9):483-4. DOI:10.5694/mja13.10153.                                                                                                                                                                                                                                                                                                                                                                                                  | Focused on specific populations           |
| 170. Perinatal Depression Screening, Diagnosis, and treatment Guideline. Available from: <a href="https://wa.kaiserpermanente.org/static/pdf/public/guidelines/depression-perinatal.pdf">https://wa.kaiserpermanente.org/static/pdf/public/guidelines/depression-perinatal.pdf</a> .                                                                                                                                                                                                                                                                                                                             | Focused on specific populations           |



| Reference of the excluded CPG                                                                                                                                                                                                                                                                                                                                                                                                                                                                                                                                                                                      | Reasons for exclusion           |
|--------------------------------------------------------------------------------------------------------------------------------------------------------------------------------------------------------------------------------------------------------------------------------------------------------------------------------------------------------------------------------------------------------------------------------------------------------------------------------------------------------------------------------------------------------------------------------------------------------------------|---------------------------------|
| 171. Andersen, B. L., DeRubeis, R. J., Berman, B. S., Gruman, J., Champion, V. L., Massie, M. J., Holland, J. C., Partridge, A. H., Bak, K., Somerfield, M. R., Rowland, J. H., & American Society of Clinical Oncology (2014). Screening, assessment, and care of anxiety and depressive symptoms in adults with cancer: an American Society of Clinical Oncology guideline adaptation. <i>Journal of clinical oncology: official journal of the American Society of Clinical Oncology</i> , 32(15), 1605–1619. <a href="https://doi.org/10.1200/JCO.2013.52.4611">https://doi.org/10.1200/JCO.2013.52.4611</a> . | Focused on specific populations |
| 172. Li M, Kennedy EB, Byrne N, Gérin-Lajoie C, Katz MR, Keshavarz H, Sellick S, Green E. Management of Depression in Patients With Cancer: A Clinical Practice Guideline. <i>J Oncol Pract</i> . 2016 Aug. 12, (8):747-56. DOI: 10.1200/JOP.2016.011072. Epub 2016 Jul 5. Erratum in: <i>J Oncol Pract</i> . 2017 Feb;13(2):144. PMID: 27382000.                                                                                                                                                                                                                                                                  | Focused on specific populations |
| 173. NATIONAL INSTITUTE FOR HEALTH AND CARE EXCELLENCE. Depression in adults with a chronic physical health problem: recognition and management. London: NICE, 2009. Available from: <a href="https://www.nice.org.uk/guidance/cg91">https://www.nice.org.uk/guidance/cg91</a> .                                                                                                                                                                                                                                                                                                                                   | Focused on specific populations |
| 174. MINISTERIO DE SALUD. Guía Clínica: Abordaje de la depresión en mujeres con cáncer de mama. Santiago: Minsal, 2017. Available from: <a href="https://diprece.minsal.cl/wrdprss_minsal/wp-content/uploads/2017/07/GPC_depresion_en_cancer_de_mama.pdf">https://diprece.minsal.cl/wrdprss_minsal/wp-content/uploads/2017/07/GPC_depresion_en_cancer_de_mama.pdf</a> .                                                                                                                                                                                                                                            | Focused on specific populations |
| 175. Concurrent Treatment for Substance Use Disorder and Trauma-Related Comorbidities: 2021 Update. Available from: <a href="https://www.cadth.ca/concurrent-treatment-substance-use-disorder-and-trauma-related-comorbidities-2021-update">https://www.cadth.ca/concurrent-treatment-substance-use-disorder-and-trauma-related-comorbidities-2021-update</a> .                                                                                                                                                                                                                                                    | Focused on specific populations |
| 176. US Preventive Services Task Force. Interventions to prevent perinatal depression. <i>JAMA</i> , Chicago, v. 321, n. 6, p. 580-587. DOI <a href="http://doi.org/10.1001/jama.2019.0007">http://doi.org/10.1001/jama.2019.0007</a> .                                                                                                                                                                                                                                                                                                                                                                            | Focused on specific populations |
| 177. Galician Health Technology Assessment Agency. Clinical Practice Guideline on the Management of Major Depression in Adults. Santiago de Compostela, Spain: Galician Health Technology Assessment Agency, 2008.                                                                                                                                                                                                                                                                                                                                                                                                 | Were outdated                   |
| 178. National Collaborating Centre for Mental Health (UK). Depression. The Treatment and Management of Depression in Adults. Leicester, UK: British Psychological Society, 2010.                                                                                                                                                                                                                                                                                                                                                                                                                                   | Were outdated                   |
| 179. Agency for Healthcare Research and Quality. Detecting Depression in Older Adults with Dementia. Ann Arbor, MI: University of Michigan Health System; [s.d].                                                                                                                                                                                                                                                                                                                                                                                                                                                   | Focused on specific populations |
| 180. Adult Depression in Primary Care. Bloomington, MN: ICSI, 2013.                                                                                                                                                                                                                                                                                                                                                                                                                                                                                                                                                | Were outdated                   |
| 181. Galletly C, Castle D, Dark F, <i>et al</i> . Royal Australian and New Zealand College of Psychiatrists clinical practice guidelines for the management of schizophrenia and related disorders. <i>Aust N Z J Psychiatry</i> 2016, 50(5):410-72. DOI:10.1177/0004867416641195.                                                                                                                                                                                                                                                                                                                                 | Subject matter                  |

| Reference of the excluded CPG                                                                                                                                                                                                                                                                                                                                                                                                                                                                                                                                                                                                   | Reasons for exclusion    |
|---------------------------------------------------------------------------------------------------------------------------------------------------------------------------------------------------------------------------------------------------------------------------------------------------------------------------------------------------------------------------------------------------------------------------------------------------------------------------------------------------------------------------------------------------------------------------------------------------------------------------------|--------------------------|
| 182. Malhi GS, Bassett D, Boyce P, <i>et al.</i> Royal Australian and New Zealand College of Psychiatrists clinical practice guidelines for mood disorders. <i>Aust N Z J Psychiatry</i> 2015, 49(12):1087-206. DOI:10.1177/0004867415617657.                                                                                                                                                                                                                                                                                                                                                                                   | Were outdated            |
| 183. Karyotaki E, Smit Y, Cuijpers P, <i>et al.</i> The Long-term Efficacy of Psychotherapy, Alone or in Combination with Antidepressants, in the Treatment of Adult Major Depression. <i>Good Clinical Practice (GCP)</i> . Brussels, Belgium: Belgian psychotherapy Health Care Knowledge Centre (KCE), 2014. Available from: <a href="#">pression_Report_0.pdf</a> .                                                                                                                                                                                                                                                         | Focused on psychotherapy |
| 184. MINISTERIO DE SALUD. Guía Clínica: Para el tratamiento de la Depresión en personas mayores de 15 años: Actualización en Psicoterapia. Santiago: MINSAL, (2017). Todos los derechos reservados. Este material puede ser reproducido total o parcialmente para fines de diseminación y capacitación. Prohibida su venta. ISBN: (número de registro) 1ª Edición: Santiago, 2017. Available from: <a href="https://diprece.minsal.cl/wrdprss_minsal/wp-content/uploads/2017/07/GPC_depresion_psicoterapia.pdf">https://diprece.minsal.cl/wrdprss_minsal/wp-content/uploads/2017/07/GPC_depresion_psicoterapia.pdf</a> .        | Focused on psychotherapy |
| 185. NATIONAL INSTITUTE FOR HEALTH AND CARE EXCELLENCE. <b>Vortioxetine for treating major depressive episodes</b> . London: NICE, 2015. Available from: <a href="https://www.nice.org.uk/guidance/ta367/resources/vortioxetine-for-treating-major-depressive-episodes-pdf-82602733813189#:~:text=Vortioxetine%20(Brintellix%2C%20Lundbeck)%20is,major%20depressive%20episodes'20in%20adults">https://www.nice.org.uk/guidance/ta367/resources/vortioxetine-for-treating-major-depressive-episodes-pdf-82602733813189#:~:text=Vortioxetine%20(Brintellix%2C%20Lundbeck)%20is,major%20depressive%20episodes'20in%20adults</a> '. | Specific drugs           |
| 186. NATIONAL INSTITUTE FOR HEALTH AND CARE EXCELLENCE. <b>Agomelatine for the treatment of major depressive episodes(terminated appraisal)</b> . London: NICE, 2011. Available from: <a href="https://www.nice.org.uk/guidance/ta231/resources/agomelatine-for-the-treatment-of-major-depressive-episodes-terminated-appraisal-pdf-82600_365554629">https://www.nice.org.uk/guidance/ta231/resources/agomelatine-for-the-treatment-of-major-depressive-episodes-terminated-appraisal-pdf-82600_365554629</a> .                                                                                                                 | Specific drugs           |
| 187. Sanacora G, Frye MA, McDonald W, Mathew SJ, Turner MS, Schatzberg AF, Summergrad P, Nemeroff CB; American Psychiatric Association (APA) Council of Research Task Force on Novel Biomarkers and Treatments. A Consensus Statement on the Use of Ketamine in the Treatment of Mood Disorders. <i>JAMA Psychiatry</i> . 2017 Apr 1, 74(4):399-405. DOI: 10.1001/jamapsychiatry.2017.0080. PMID: 28249076.                                                                                                                                                                                                                     | Specific drugs           |
| 188. Tran K, Argáez C. Quetiapine for Major Depressive Disorder: A Review of Clinical Effectiveness, Cost-Effectiveness, and Guidelines [Internet]. Ottawa (ON): Canadian Agency for Drugs and Technologies in Health, 2020 Jan 30. PMID: 33074605.                                                                                                                                                                                                                                                                                                                                                                             | Specific drugs           |
| 189. Esketamine for Treatment-Resistant Depression. Available from: <a href="https://www.hopkinsmedicine.org/health/treatment-tests-and-therapies/esketamine-for-treatment-resistant-depression">https://www.hopkinsmedicine.org/health/treatment-tests-and-therapies/esketamine-for-treatment-resistant-depression</a> ketamine for Treatment-Resistant Depression.                                                                                                                                                                                                                                                            | Specific drugs           |

| <b>Reference of the excluded CPG</b>                                                                                                                                                                                                                                                                                                                                                                                                                             | <b>Reasons for exclusion</b> |
|------------------------------------------------------------------------------------------------------------------------------------------------------------------------------------------------------------------------------------------------------------------------------------------------------------------------------------------------------------------------------------------------------------------------------------------------------------------|------------------------------|
| 190. Tran K, McGill SC, Horton J. Bupropion for Treatment-Resistant Depression [Internet]. Ottawa (ON): Canadian Agency for Drugs and Technologies in Health, 2021 Apr. Available from: <a href="https://www.ncbi.nlm.nih.gov/books/NBK571945/">https://www.ncbi.nlm.nih.gov/books/NBK571945/</a> .                                                                                                                                                              | Specific drugs               |
| 191. Antidepressants for Adults with Depression using Opioid Medications: Clinical Effectiveness and Guidelines. Ottawa: CADTH; 2018 Feb. (CADTH rapid response report: summary of abstracts). Available from: <a href="https://www.cadth.ca/sites/default/files/pdf/htis/2018/RB1196%20Antidepressants%20with%20opioid%20use%20Final.pdf">https://www.cadth.ca/sites/default/files/pdf/htis/2018/RB1196%20Antidepressants%20with%20opioid%20use%20Final.pdf</a> | Was not a CPG                |
